# Supplementary material for: Effects of egg phosvitin on mucosal transcriptional profiles and luminal microbiota composition in murine colon
Source: Royal Society of Chemistry journal article supplement (doi:10.1039/c9fo00074g), 2019-01-01
Supplement: c9fo00074g1.pdf [file c9fo00074g1.pdf]

Table S1. The nutritional ingredients of the commercially prepared diet.

| Protein (%) | Fat (%) | Fiber (%) | Ash (%) | Lysine (%) | Calcium (%) | Phosphorus (%) | NaCl (%) | Water (%) |
|-------------|---------|-----------|---------|------------|-------------|----------------|----------|-----------|
| ≥ 20        | ≥ 4.0   | ≤ 5.0     | ≤ 8.0   | ≥ 1.32     | 1.0-1.8     | 0.6-1.2        | ≤ 1.0    | ≤ 10      |
