# Supplementary material for: Effects of egg phosvitin on mucosal transcriptional profiles and luminal microbiota composition in murine colon
Source: Royal Society of Chemistry journal article supplement (doi:10.1039/c9fo00074g), 2019-01-01

Figure S1. Shannon index of microbiota between control and PSV groups for both young (3-week old) and adult (8-week old) mice (n = 5 for each group).

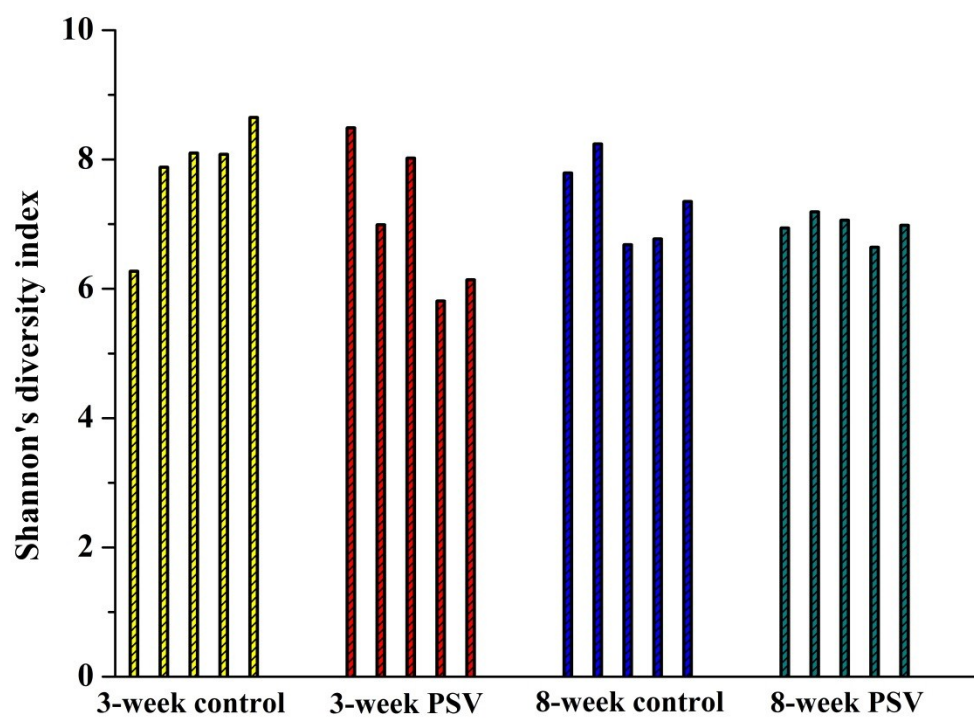

Figure S2. Effect of age on luminal microbiota in mice (n = 5 per group). a, relative abundance of main phyla for young and adult groups; b, relative abundance of main genera for young group and adult groups; c, principal coordinate (PCoA) score plots based on unweighted UniFrac metrics for young and adult groups, each point represents the composition of luminal microbiota of one mouse; d, PLS-DA score plots of luminal microbiota of mice for young and adult groups; e, the significantly different microbiota at phylum level between young and adult groups ( $p < 0.05$ ); f, the different microbiota at genus level between young and adult groups ( $p < 0.05$ ).

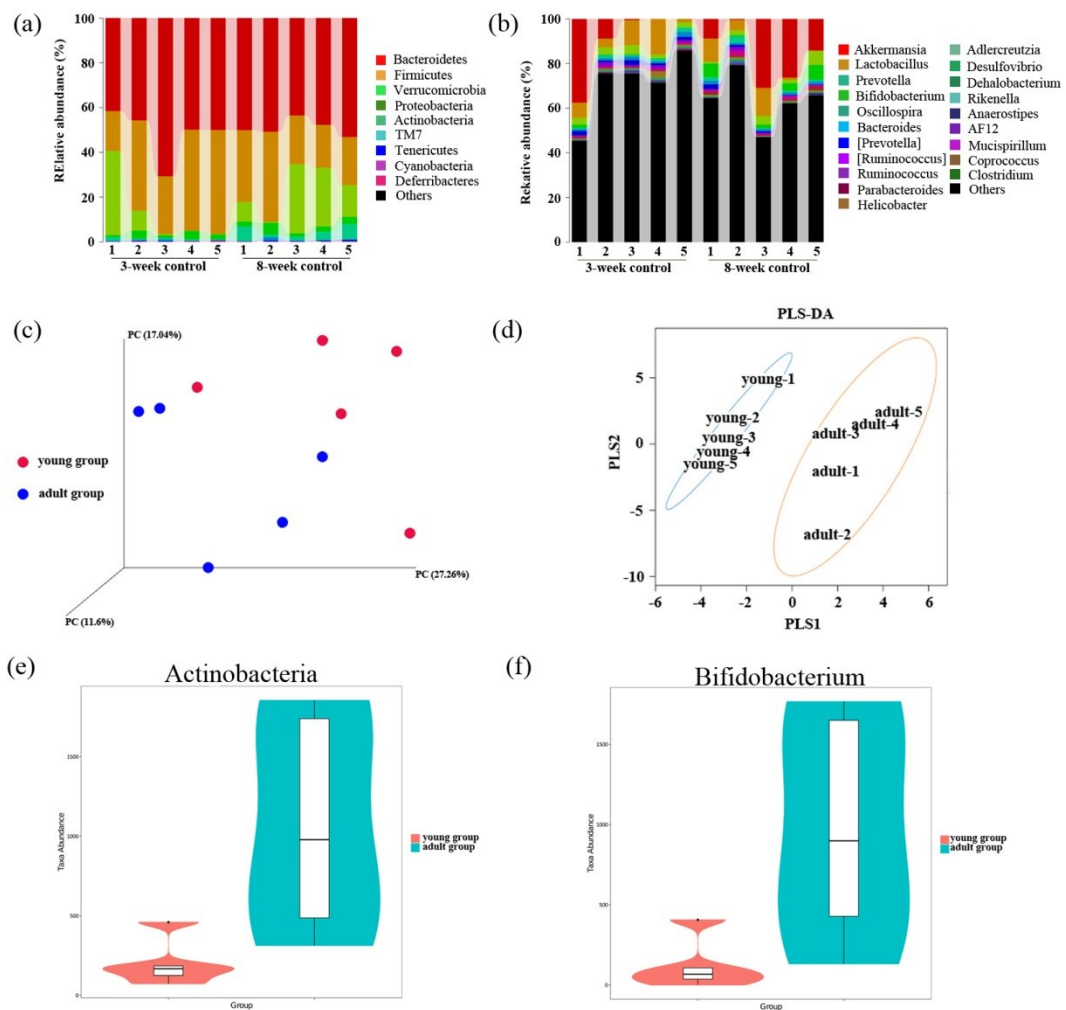

Supplement: c9fo00074g2.pdf [file c9fo00074g2.pdf]
